# Supplementary material
Source: Springer Nature journal article supplement (https://www.springermedizin.de/resource/supplementary/13000_2010_309_MOESM1_ESM.pdf/9624290)

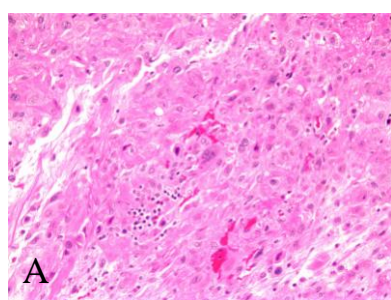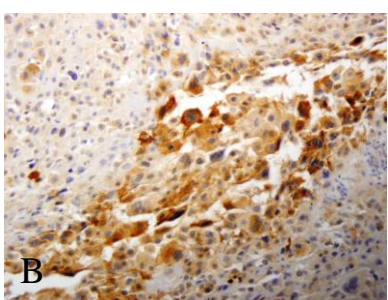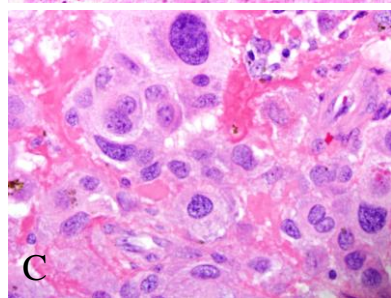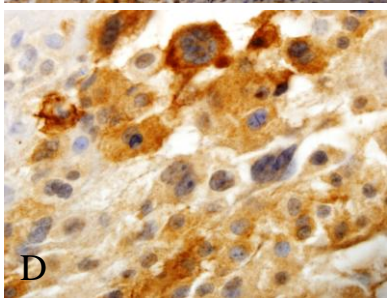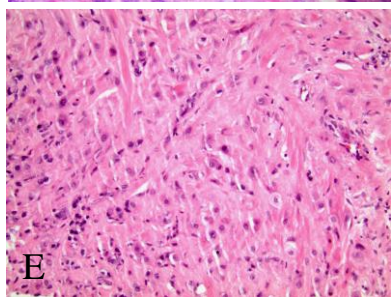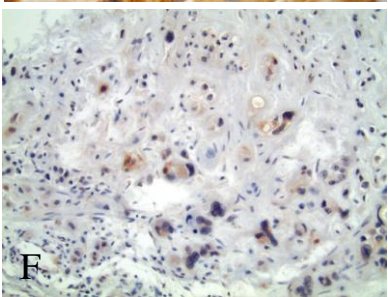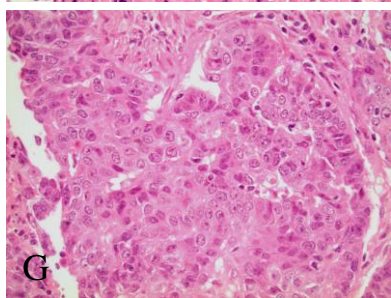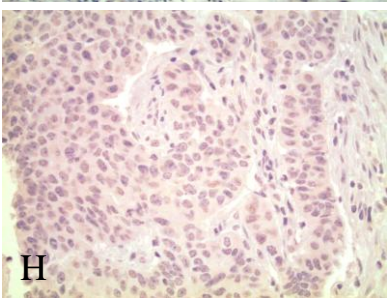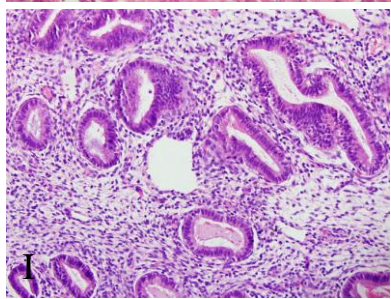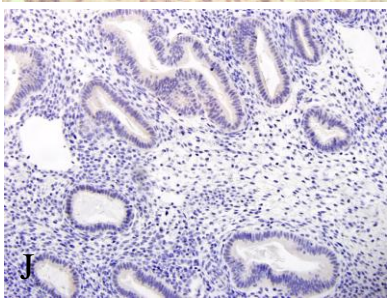

Supplement: MOESM1 [file 9624290]
